# Supplementary material for: Evaluation of ciprofloxacin destruction between ordered mesoporous and bulk NiMn2O4/CF cathode: efficient mineralization in a heterogeneous electro-Fenton-like process
Source: Royal Society of Chemistry journal article supplement (doi:10.1039/c8en01279b), 2019-01-01
Supplement: c8en01279b1.pdf [file c8en01279b1.pdf]

## Supporting Information

### **Evaluation of Ciprofloxacin Destruction between Ordered Mesoporous and Bulk NiMn<sub>2</sub>O<sub>4</sub>/CF Cathode: Efficient Mineralization in a Heterogeneous Electro-Fenton-like Process**

Yan Sun,<sup>a</sup> Yi Li,<sup>b</sup> Xueyue Mi,<sup>a</sup> Sihui Zhan<sup>\*a</sup> and Wenping Hu<sup>b</sup>

<sup>a</sup> Key Laboratory of Pollution Processes and Environmental Criteria (Ministry of Education) / Tianjin Key Laboratory of Environmental Remediation and Pollution Control, College of Environmental Science and Engineering, Nankai University, Tianjin, 300071, P. R. China.

<sup>b</sup> Tianjin Key Laboratory of Molecular Optoelectronic Sciences, Department of Chemistry, School of Science, Tianjin University & Collaborative Innovation Center of Chemical Science and Engineering (Tianjin), Tianjin, 300072, P. R. China.

\*Corresponding Authors

E-mail address: [sihuizhan@nankai.edu.cn](mailto:sihuizhan@nankai.edu.cn) (Zhan Sihui)

**Table S1.** The BET specific area, pore volume, and average pore diameter of catalysts

| <b>Samples</b>                            | <b>Specific area<br/>(m<sup>2</sup>·g<sup>-1</sup>)</b> | <b>Pore volume<br/>(cc·g<sup>-1</sup>)</b> | <b>Average pore<br/>diameter (nm)</b> |
|-------------------------------------------|---------------------------------------------------------|--------------------------------------------|---------------------------------------|
| <b>meso-NiMn<sub>2</sub>O<sub>4</sub></b> | 262                                                     | 0.33                                       | 4.63                                  |
| <b>bulk-NiMn<sub>2</sub>O<sub>4</sub></b> | 55                                                      | 0.18                                       | 9.32                                  |

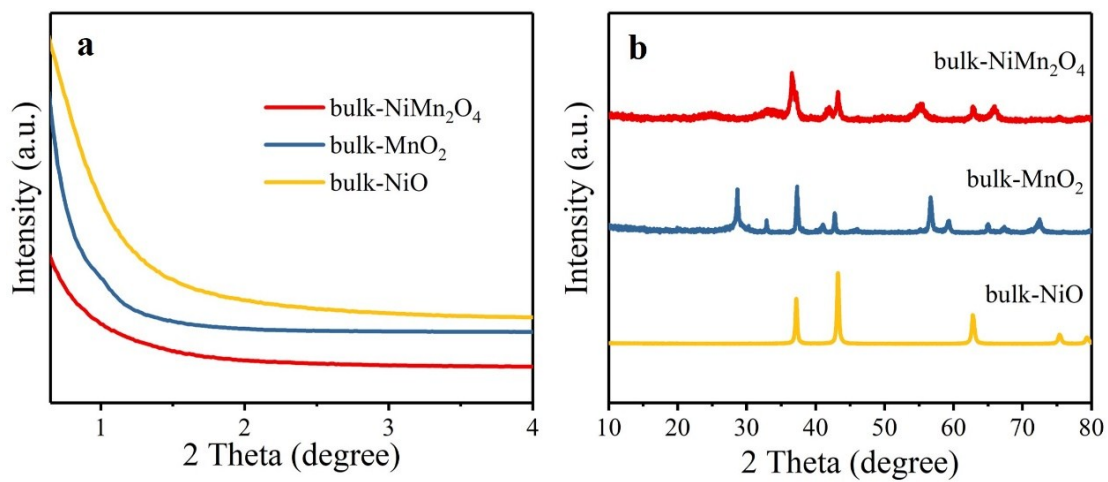

**Fig. S1** (a) Low angle XRD patterns and (b) wide angle XRD patterns of bulk-NiMn<sub>2</sub>O<sub>4</sub>, bulk-MnO<sub>2</sub> and bulk-NiO.

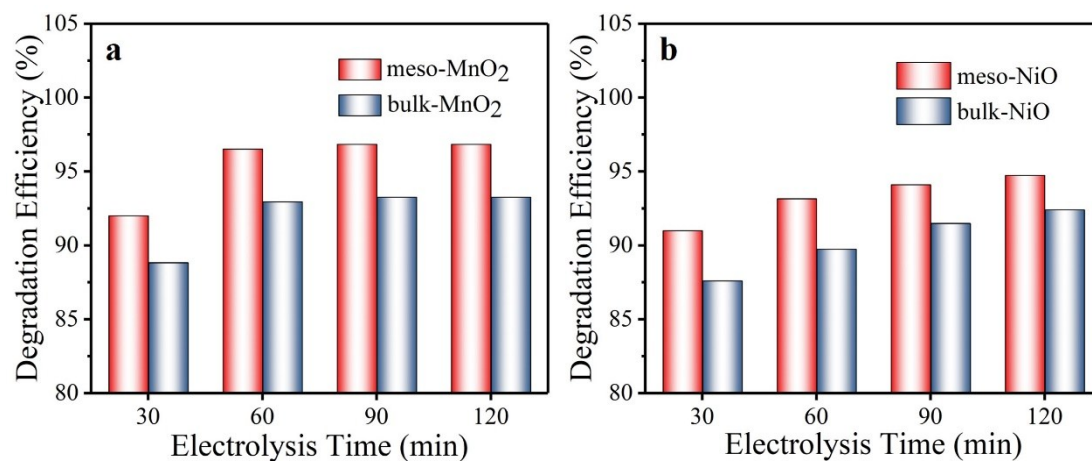

**Fig. S2** Degradation efficiency of CIP with various catalysts/CF cathodes in EF-like process. (a) meso-MnO<sub>2</sub>/CF and bulk-MnO<sub>2</sub>/CF. (b) meso-NiO and bulk-NiO.

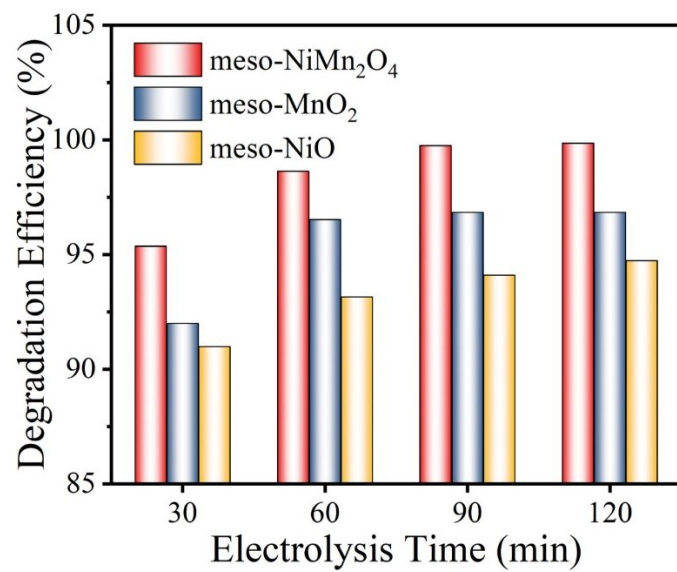

**Fig. S3** Degradation efficiency of CIP with meso-MnO<sub>2</sub>/CF, meso-NiO/CF and meso-NiMn<sub>2</sub>O<sub>4</sub>/CF cathodes in EF-like process.

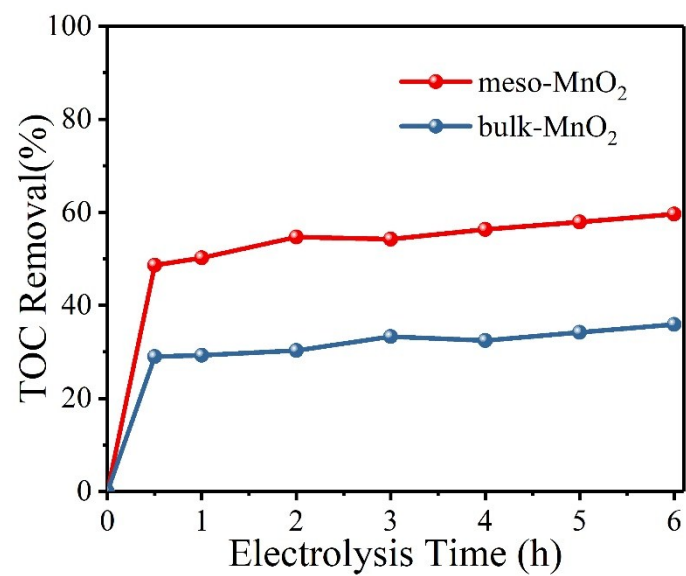

**Fig. S4** TOC removal of CIP with meso-MnO<sub>2</sub>/CF and bulk-MnO<sub>2</sub>/CF cathodes in EF-like process.

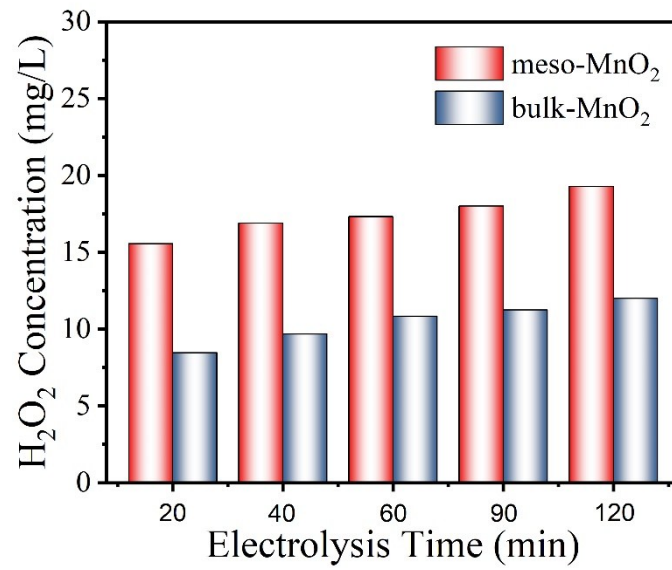

**Fig. S5** The concentration of in situ electro-generated H<sub>2</sub>O<sub>2</sub> with meso-MnO<sub>2</sub>/CF and bulk-MnO<sub>2</sub>/CF cathodes in EF-like process.

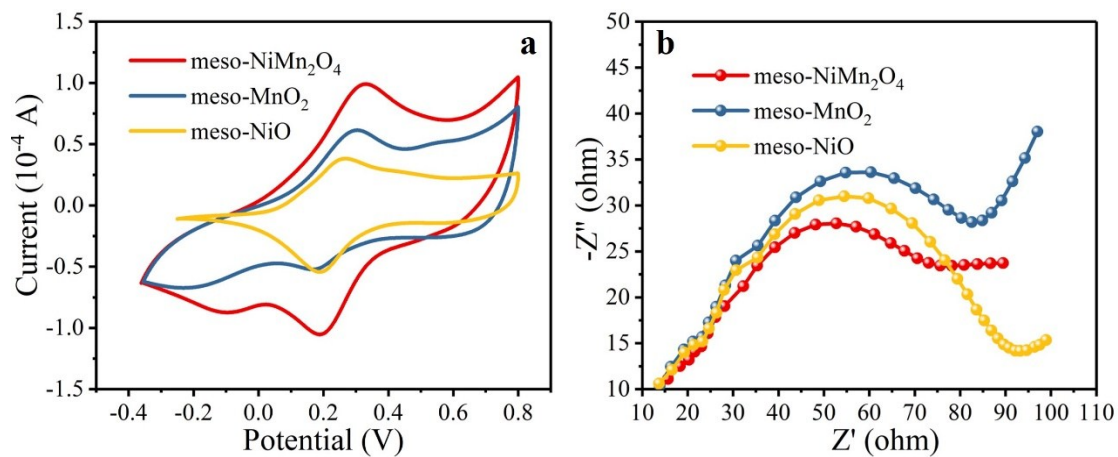

**Fig. S6** (a) Cyclic voltammety curves and (b) EIS Nyquist plots of meso-NiMn<sub>2</sub>O<sub>4</sub>, meso-MnO<sub>2</sub> and meso-NiO.



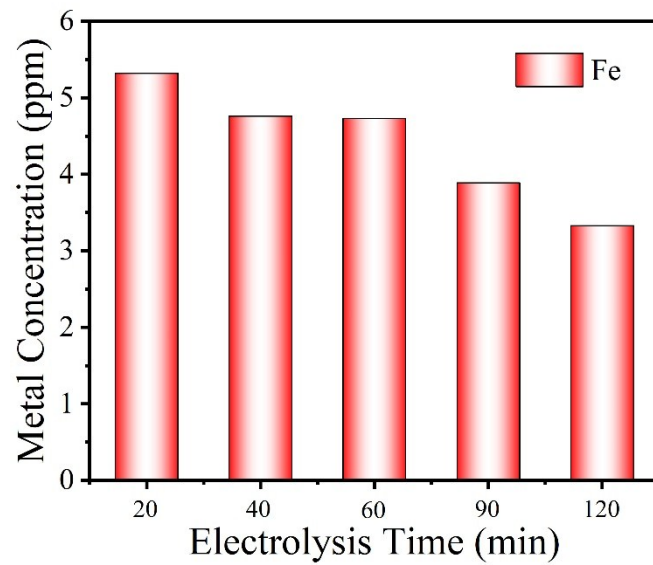

**Fig. S7** The concentration of Fe element during electrolysis in EF-like process.

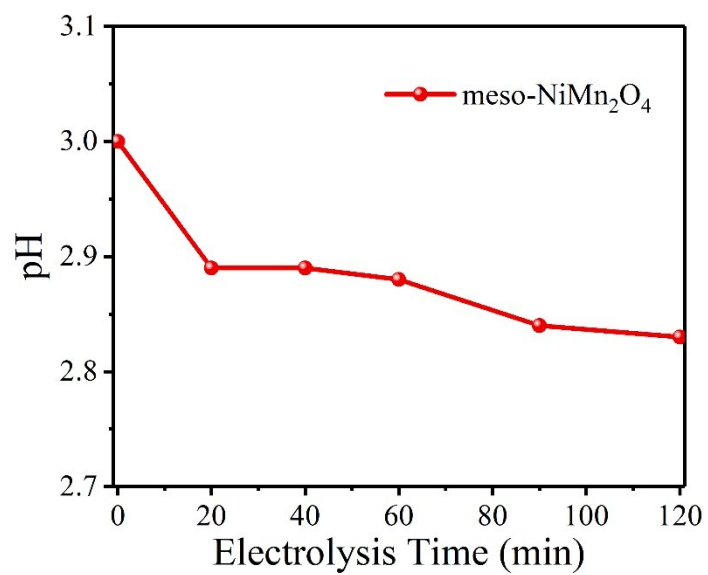

**Fig. S8** The pH of solution during electrolysis in EF-like process with meso-NiMn<sub>2</sub>O<sub>4</sub>/CF cathode.
